# Supplementary material
Source: PubMed Central journal article supplement (PMC4366425)
Supplement: NIHMS668576-supplement-Suppl_Table_1.pdf [file NIHMS668576-supplement-Suppl_Table_1.pdf]

**Supplementary Table 1. *In-vitro* IC50s for the listed kinases against sorafenib.**

*In-vitro* kinase assays were performed against sorafenib with a staurosporine positive control across a concentration range of 0.5 nM to 10  $\mu$ M). Blank values are those for which no significant inhibition occurred over the entire concentration range.

| <b>Kinase</b> | <b>Sorafenib IC50 (nM)</b> | <b>Staurosporine IC50 (nM)</b> |
|---------------|----------------------------|--------------------------------|
| ASK1/MAP3K5   |                            | 5.31                           |
| BRAF          | 85.62                      | ND                             |
| COT1/MAP3K8   |                            | ND                             |
| DLK/MAP3K12   |                            | 34.90                          |
| GCK/MAP4K2    |                            | <1.0                           |
| HGK/MAP4K4    | 1680.00                    | <1.0                           |
| HPK1/MAP4K1   | >10000                     | ND                             |
| JNK1          |                            | 1119.00                        |
| JNK2          | 9957.00                    | 781.60                         |
| JNK3          |                            | ND                             |
| KHS/MAP4K5    | 653.30                     | <1.0                           |
| MEKK1         | 5518.00                    | 443.20                         |
| MEKK2         | >10000                     | 4.82                           |
| MEKK3         |                            | 3.15                           |
| MINK/MINK1    | 3390.00                    | <1.0                           |
| MKK4          |                            | 619.90                         |
| MKK6          |                            | 5.43                           |
| MLK1/MAP3K9   |                            | <1.0                           |
| MLK2/MAP3K10  | >10000                     | 1.50                           |
| MLK3/MAP3K11  | 7177.00                    | 1.22                           |
| MST1/STK4     |                            | <1.0                           |
| NIK/MAP3K14   |                            | 1106.00                        |
| OSR1/OXSR1    |                            | 36.84                          |
| P38a/MAPK14   | 106.00                     | ND                             |
| P38b/MAPK11   | 209.10                     | ND                             |
| P38d/MAPK13   | 8981.00                    | 40.52                          |
| P38g          | >10000                     | 116.90                         |
| PAK1          |                            | <1.0                           |
| PAK5          |                            | 1.92                           |
| RAF1          | 5.65                       | ND                             |
| SLK/STK2      | 7316.00                    | 6.51                           |
| STK39/STLK3   |                            | 9.78                           |
| TAK1          | 1945.00                    | 17.37                          |
| TAOK1         | 853.70                     | <1.0                           |
| TAOK2/TAO1    | 59.77                      | 1.18                           |
| TAOK3/JIK     | 894.70                     | <1.0                           |
| TNIK          | 3389.00                    | <1.0                           |
| ZAK/MLTK      | 48.59                      | ND                             |
